# Supplementary material
Source: PubMed Central journal article supplement (PMC3193447)
Supplement: cr2011146x8.pdf [file cr2011146x8.pdf]

## Supplementary information, Figure S1

Figure S1

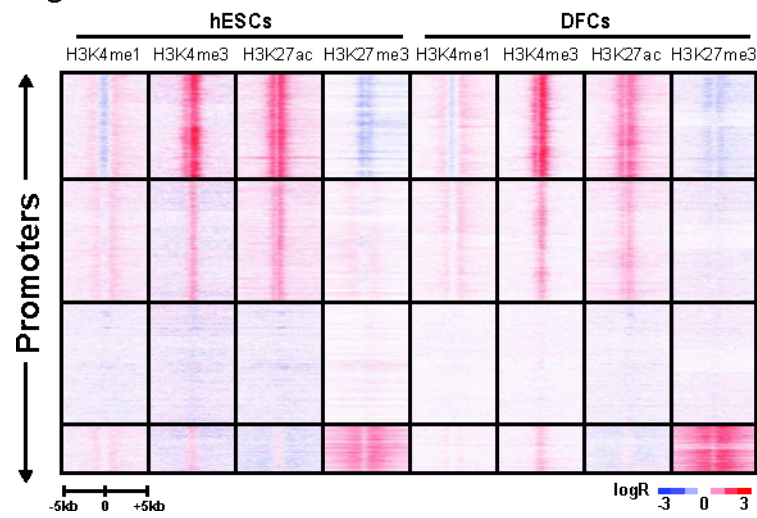

**Figure S1**, related to **Figure 1** k-means cluster of modifications at 22 047 gene transcription start sites (center of 10-kb window). The figure is organized as in Figure 1. k-means = 4.
