# Supplementary material
Source: PubMed Central journal article supplement (PMC3193447)
Supplement: cr2011146x9.pdf [file cr2011146x9.pdf]

## Supplementary information, Figure S2

Figure S2

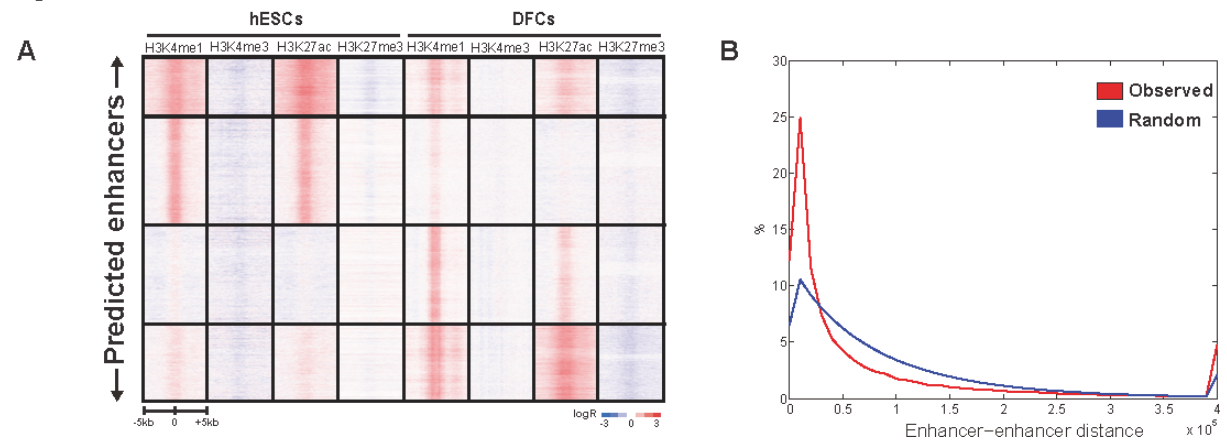

**Figure S2, related to Figure 2 (A)** k-means cluster of predicted enhancers in hESCs and DFCs. K means= 4. **(B)** Distribution of distances between adjacent enhancers.
