# Supplementary material
Source: PubMed Central journal article supplement (PMC3193447)
Supplement: cr2011146x10.pdf [file cr2011146x10.pdf]

## Supplementary information, Figure S3

Figure S3

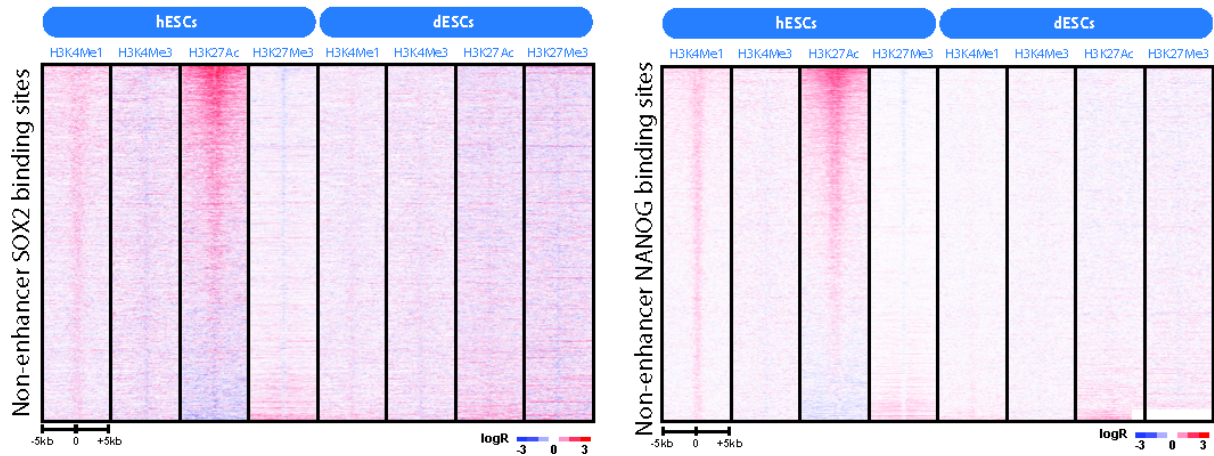

**Figure S3, related to Figure 2** Clustering of histone modifications at distal SOX2 and NANOG binding sites not predicted as enhancers. Binding sites are ranked by acetylation levels. The clusters illustrate that most sites present some H3K4me1 and H3K27ac, suggesting they are enhancer sites not called by the prediction algorithm. SOX2 sites are shown in the left cluster, NANOG sites are in the right cluster.
