# Supplementary material
Source: PubMed Central journal article supplement (PMC3193447)
Supplement: cr2011146x12.pdf [file cr2011146x12.pdf]

# Supplementary information, Figure S5

## Figure S5

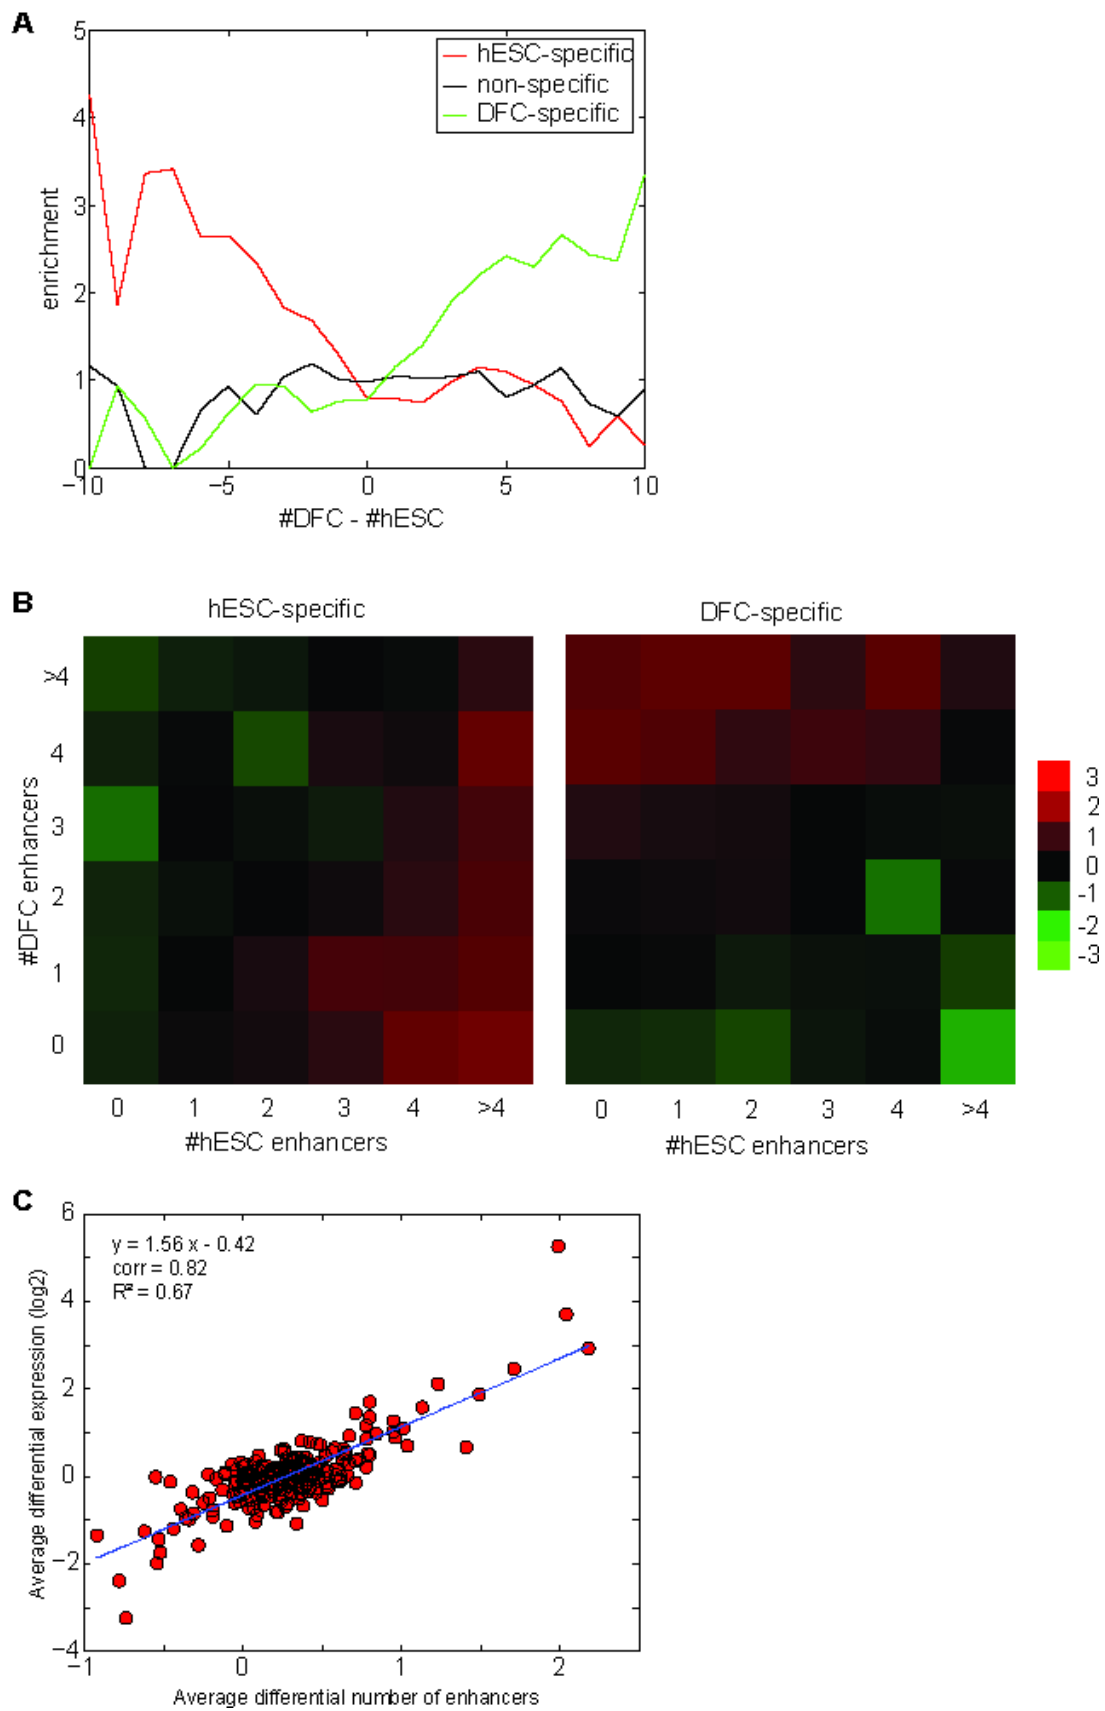

**Figure S5, related to Figure 3** Changes in enhancer numbers correspond to changes in gene expression. **(A)** For each of the 1 000 hESC-specific (red), 1 000 DFC-specific (green), and 1 000 non-specific (black) genes, we counted the number of enhancers found before and after differentiation within the CTCFdefined domain. We then plotted the distribution of this difference normalized over the distribution of all genes. **(B)** As in **A**, except directly comparing enhancer numbers within CTCF-defined domains for hESCspecific genes (right) and DFC-specific genes (left). The enrichment ratio, as above, is shown as a heatmap (red = enrichment; green lack of enrichment). **A, B** show a transition in enhancer use for cell-type specific gene expression. **(C)** Plot of differential enhancer number as a function of differential expression for all 22 047 genes, averaged into 100 gene bins. The fitted line shows a correlation between differential enhancer number and differential gene expression.
