# Supplementary material
Source: PubMed Central journal article supplement (PMC3193447)
Supplement: cr2011146x13.pdf [file cr2011146x13.pdf]

Supplementary information, Figure S6

Figure S6

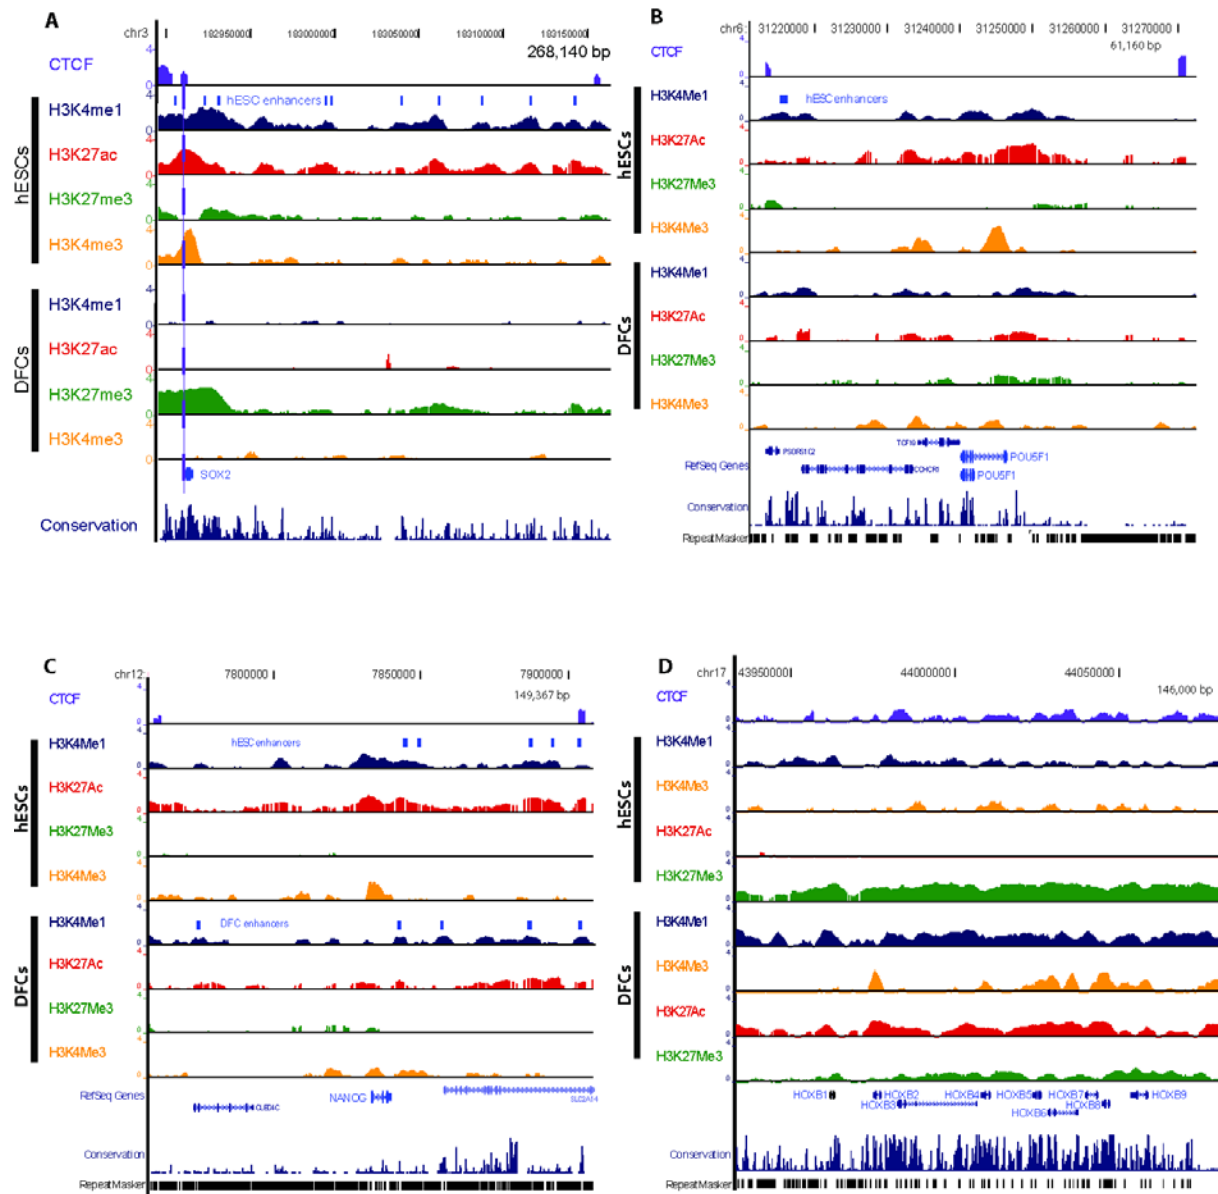

**Figure S6**, related to **Figure 3** UCSC Genome browser shots of histone modifications and enhancer predictions in CTCF-defined blocks (CORDs) containing **(A) SOX2**, **(B) OCT4(POU5F1)**, **(C) NANOG**, and the **(D) HOXB** locus. Figure is displayed as those in the main text. Gene names are at the 5' end of the gene.
