# Supplementary material
Source: PubMed Central journal article supplement (PMC3193447)
Supplement: cr2011146x14.pdf [file cr2011146x14.pdf]

enhancers exhibit cell type-specific acetylation, although mono-methylated in both cell types. **(B)** Assessment of enhancer enrichment during a time course of gene expression during BMP4 treatment. Early response genes are more enriched in shared enhancers acetylated in DFCs (yellow) compared to DFC-specific (red), hESC-specific (dark blue), or shared enhancers with hESC acetylation (light blue).
